# Supplementary material for: In vivo potential of polymeric N-acryloyl-glycine nanoparticles with anti-inflammatory activities for wound healing
Source: Royal Society of Chemistry journal article supplement (doi:10.1039/d3ma00378g), 2023-01-01
Supplement: d3ma00378g1.pdf [file d3ma00378g1.pdf]

## ***In vivo* Potential of Polymeric N-Acryloyl-Glycine Nanoparticles with Anti-inflammatory Activities for Wound Healing**

Prem Shankar Gupta,<sup>a</sup> Kirti Wasnik,<sup>a</sup> Gurmeet Singh,<sup>a</sup> Sukanya Patra,<sup>a</sup> Divya Pareek,<sup>a</sup> Desh Deepak Yadav,<sup>a</sup> Munender Singh Tomer,<sup>b</sup> Samedutta Maiti,<sup>c</sup> Monika Singh,<sup>a</sup> and Pradip Paik<sup>\*</sup>

---

<sup>a</sup> School of Biomedical Engineering, Indian Institute of Technology (BHU), Varanasi, India, \*P. Paik (E-mail: paik.bme@iitbhu.ac.in)

<sup>b</sup> Department of Pharmaceutical Sciences, Skaggs School of Pharmacy and Pharmaceutical Sciences, University of Colorado, Aurora, USA

<sup>c</sup> School of Engineering Science and Technology, University of Hyderabad, Hyderabad, India

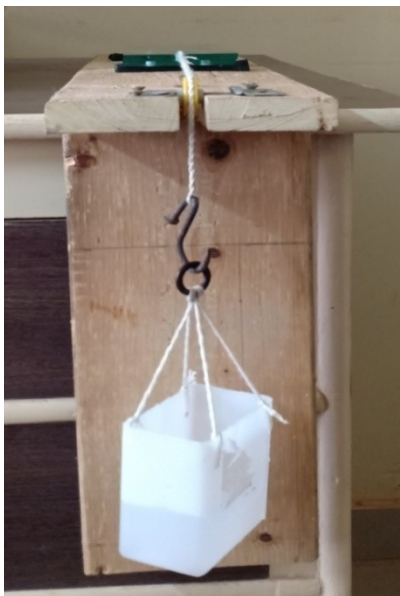

Figure S1: Apparatus for measurement of the spreadability of nanoformulation

**Animal Protocol and Ethics:** All the animal studies were examined and approved (Approval No. IIT(BHU)/IAEC/2022/078, dated 03/05/2022) by the Institutional Animal Ethical Committee established at Department of Pharmaceutical Engineering and Technology, Indian Institute of Technology (BHU), Varanasi (Registration no. 2123/GO/Re/S/21/CPCSEA). The use of animals in this work was carried out in compliance with the IEAC's recommendations and guidelines. In a nutshell, the male Wistar rats (wt: 125-150 gm, age: 12-14 weeks) were purchased from Institute

of Medical Sciences, BHU and Central Drug Research Institute, Lucknow. They were given unrestricted access to the laboratory by keeping them in cage and put on fed to commercial pellet meal and unlimited amounts of water. Prior to the start of the experiment, the animals have to spend 1 week becoming acclimatize to the laboratory environment. One day before to the commencement of the experiment, all rats had their skin cleansed with water and shaved with the help of an electric razor. The skin was then disinfected with a povidone-iodine solution or with 70% v/v ethanol solution, and kept apart in animal cages. The animals were given a once-over for general health on the day of the experiment, right before the application of test material, and the skin was inspected for any anomalies. Only when there was no visible evidence of prior skin irritation were experiments carried out. Pentobarbital sodium (50 mg/kg) was injected intraperitoneally to anaesthetize rats. The absence of pedal and corneal responses confirmed anaesthesia. At 0<sup>th</sup>, 12<sup>th</sup>-, and 24<sup>th</sup>h following surgery, tramadol hydrochloride (20 mg/kg) was administered intraperitoneally as an analgesic.

Table S1: Table showing the ingredients (in percentage) used for the preparation of oleaginous ointment base

| S. No | Ingredients           | Weight (%) |
|-------|-----------------------|------------|
| 1.    | Glycerine             | 5          |
| 2.    | Paraffin Wax          | 10         |
| 3.    | Liquid Paraffin       | 15         |
| 4.    | Stearyl Alcohol       | 25         |
| 5.    | White soft Paraffin   | 45         |
| 6.    | Triethanolamine (98%) | q.s.       |

#### Draize Scoring System<sup>1,2</sup>

Table S2: Dermal irritability grading system according to Draize

| Value | Erythema development     | Value | Oedema development     |
|-------|--------------------------|-------|------------------------|
| 0     | No erythema              | 0     | No oedema              |
| 1     | Extremely minor erythema | 1     | Extremely minor oedema |

|   |                                                                 |   |                                                             |
|---|-----------------------------------------------------------------|---|-------------------------------------------------------------|
| 2 | Mild erythema (well defined margins)                            | 2 | Mild oedema (well defined margins)                          |
| 3 | Moderate severe erythema (Specified colour and erythema region) | 3 | Moderate severe oedema (Specified colour and oedema region) |
| 4 | Maximum possible erythema                                       | 4 | Maximum possible oedema                                     |

Erythema and edema were graded on a scale of 0–4, with 0 denoting no symptoms and 4 denoting severe ones. The average irritation score per time point was calculated for each animal by summing the cutaneous response scored at 1 h, 24 h, 48 h, and 72 h following the removal of the test substance and dividing the result by four group. The results for PNAG nanoformulation induced skin irritation were compared with the basic formulation and with a positive control. The dermal irritation index (PDII) was calculated using the following equation.

$$PDII = \frac{PDI}{4} \quad 1$$

Table S3: Qualitative characterization of base formulation and PNAG-nanoformulation on the basis of observational parameters

| S. No. | Quality Parameter           | Required quality                         | Formulation base | PNAG-nanoformulation |
|--------|-----------------------------|------------------------------------------|------------------|----------------------|
| 1      | Colour                      | Same as API's colour or white/ off white | Colourless/White | Colourless/White     |
| 2      | Appearance                  | Homogenous                               | Homogenous       | Homogenous           |
| 3      | Consistency/<br>Homogeneity | Good                                     | Good             | Good                 |
| 4      | Phase Separation            | No                                       | No               | No                   |
| 5      | Odour                       | Same as API's odour/<br>Odourless        | Odourless        | Odourless            |

Table S2: in-vivo wound healing results shown in terms of relative area of wound

| Days | Formulation base<br>(Mean $\pm$ SD) | PNAG Nanoformulation<br>(Mean $\pm$ SD) |
|------|-------------------------------------|-----------------------------------------|
| 0    | 100.00 $\pm$ 2.80                   | 100.00 $\pm$ 0.97                       |
| 1    | 104.79 $\pm$ 2.74                   | 105.08 $\pm$ 1.62                       |
| 3    | 96.45 $\pm$ 2.38                    | 95.12 $\pm$ 0.71                        |
| 5    | 92.96 $\pm$ 2.47                    | 90.19 $\pm$ 3.25                        |
| 7    | 83.15 $\pm$ 4.28                    | 72.63 $\pm$ 5.44                        |
| 9    | 70.91 $\pm$ 4.81                    | 25.33 $\pm$ 0.34                        |
| 11   | 67.17 $\pm$ 7.17                    | 4.49 $\pm$ 0.88                         |
| 13   | 55.47 $\pm$ 3.83                    | 2.93 $\pm$ 0.43                         |
| 14   | 30.74 $\pm$ 3.11                    | 0.00 $\pm$ 0.1                          |

# NMR

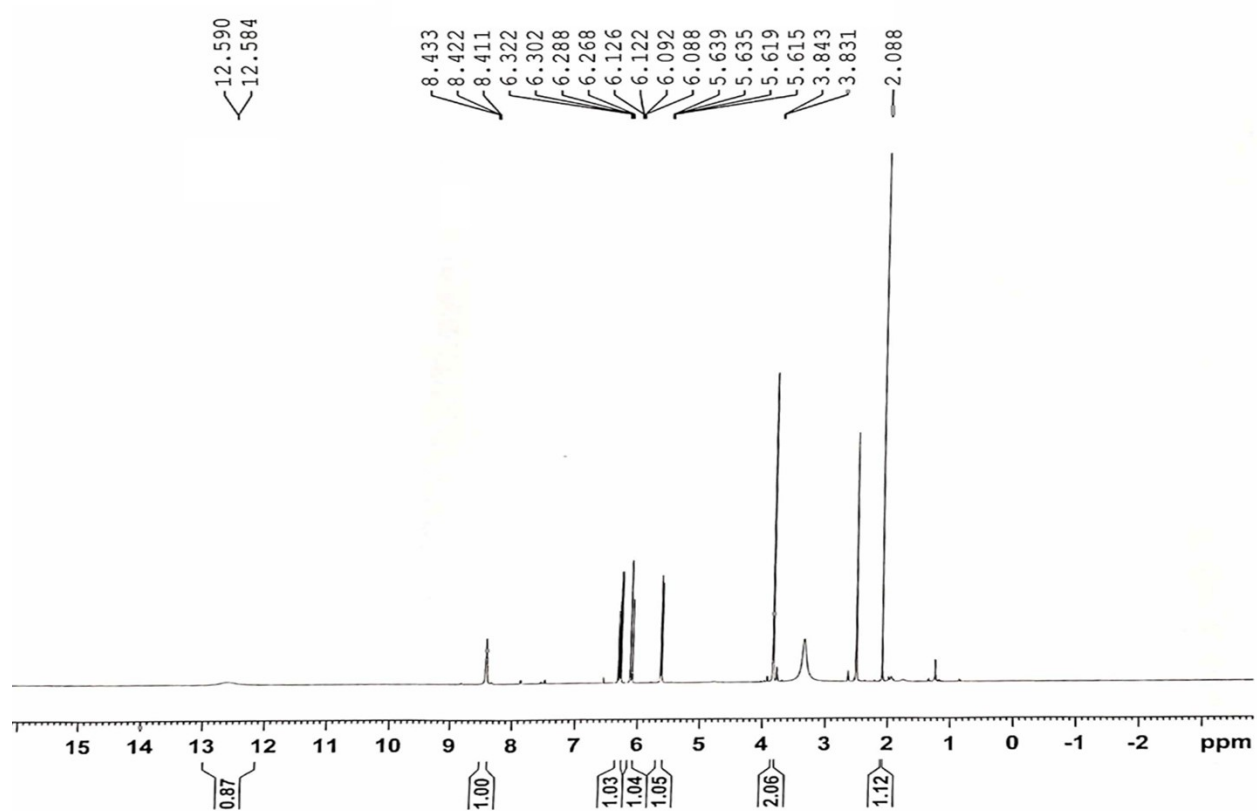

Figure S2:  $^1\text{H}$ -NMR spectrum of N-acryloyl-glycine (NAG), monomer recorded in DMSO deuterated (500 MHz)

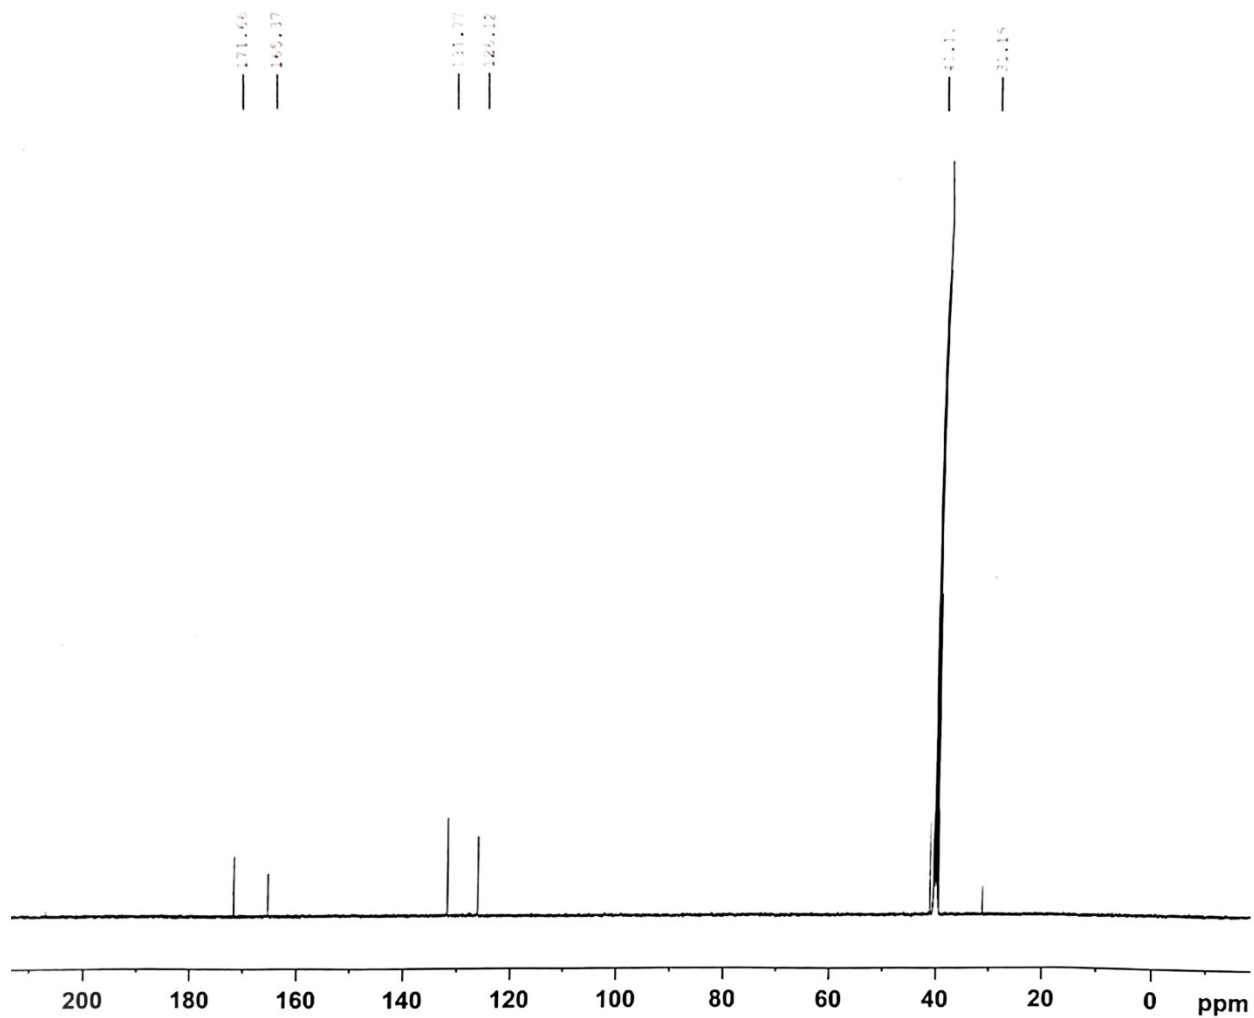

Figure S3:  $^{13}\text{C}$ -NMR spectrum of N-acryloyl-glycine (NAG), monomer recorded in DMSO deuterated (500 MHz)

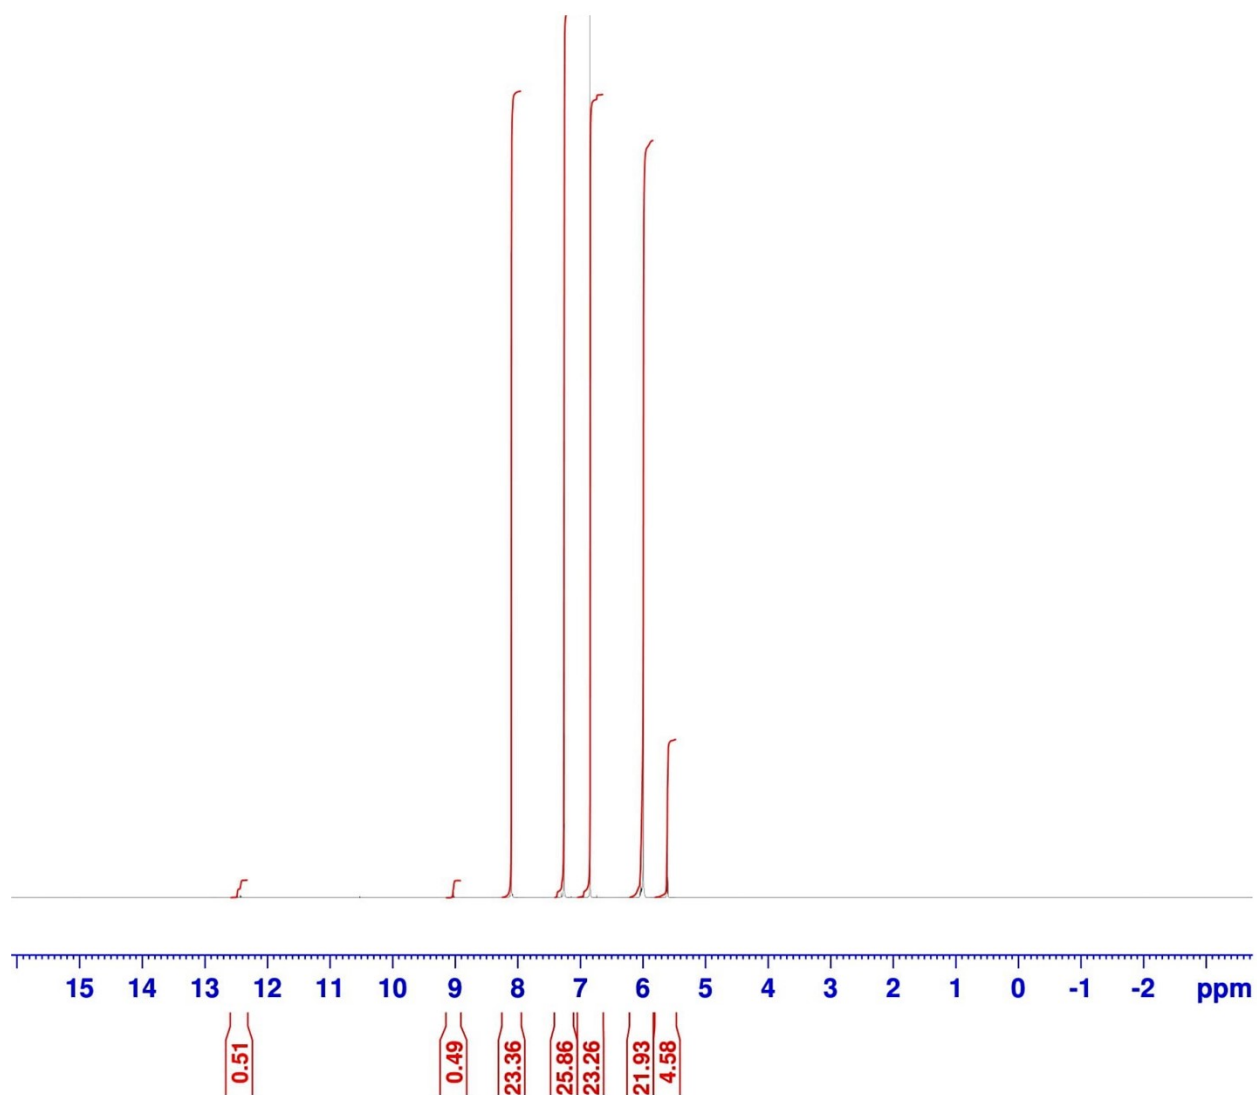

Figure S4:  $^1\text{H}$ -NMR spectrum of Poly-N-acryloyl-glycine (PNAG), monomer recorded in  $\text{CDCl}_3$  deuterated (500 MHz)

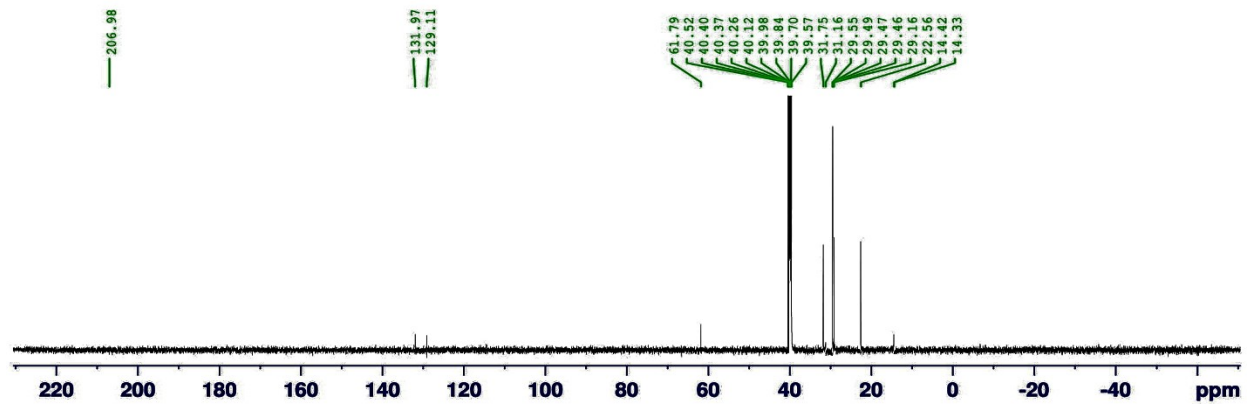

Figure S5:  $C^{13}$ -NMR spectrum of Poly-N-acryloyl-glycine (PNAG), monomer recorded in  $CDCl_3$  deuterated (500 MHz)



# Particle size and zeta potential

## Results

|                               | Size (d.nm):         | % Intensity: | St Dev (d.n...) |
|-------------------------------|----------------------|--------------|-----------------|
| <b>Z-Average (d.nm):</b> 5756 | <b>Peak 1:</b> 40.2  | 100.0        | 15.53           |
| <b>Pdl:</b> 1.000             | <b>Peak 2:</b> 0.000 | 0.0          | 0.000           |
| <b>Intercept:</b> 1.06        | <b>Peak 3:</b> 0.000 | 0.0          | 0.000           |

**Result quality :** Refer to quality report

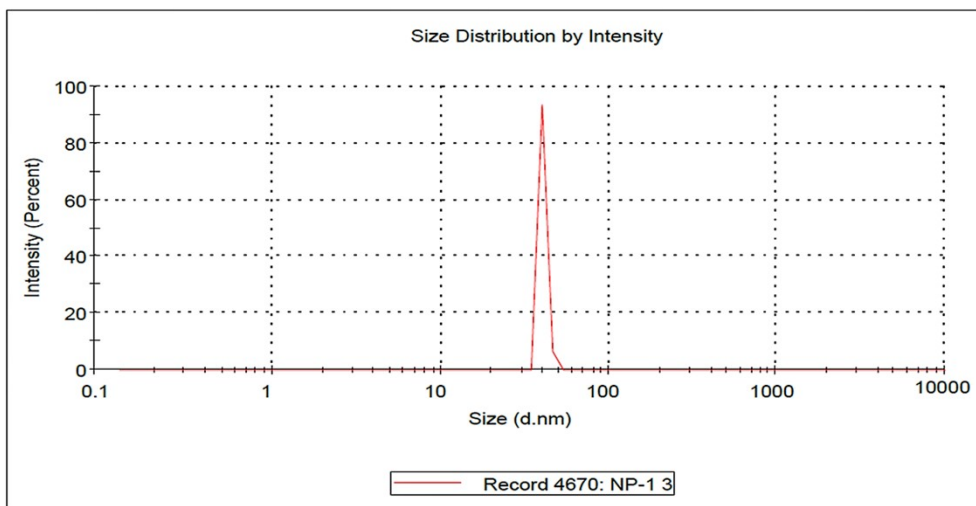

|                                     | Mean (mV)            | Area (%) | St Dev (mV) |
|-------------------------------------|----------------------|----------|-------------|
| <b>Zeta Potential (mV):</b> -21.9   | <b>Peak 1:</b> -21.9 | 100.0    | 5.61        |
| <b>Zeta Deviation (mV):</b> 5.61    | <b>Peak 2:</b> 0.00  | 0.0      | 0.00        |
| <b>Conductivity (mS/cm):</b> 0.0561 | <b>Peak 3:</b> 0.00  | 0.0      | 0.00        |

**Result quality :** Good

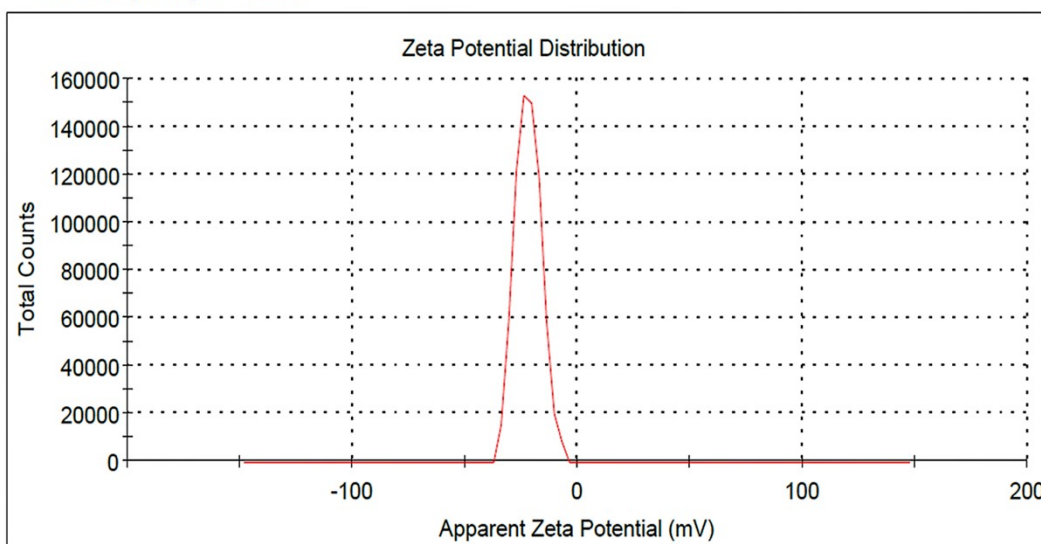

Figure S6: PNAG NPs particle size and zeta potential recorded by dispersing in PBS (pH 7.4)

1. Draize, J. H., Methods for the study of irritation and toxicity of substances applied topically to the skin and mucous membranes. *J. Pharmacol. Exp. Ther.* 1944, 82, 377-390.
2. Djerrou, Z.; Djaalab, H.; Riachi, F.; Serakta, M.; Chettoum, A.; Maameri, Z.; Boutobza, B.; Hamdi-Pacha, Y., Irritantcy potential and sub acute dermal toxicity study of Pistacia lentiscus fatty oil as a topical traditional remedy. *African journal of traditional, complementary, and alternative medicines : AJTCAM* 2013, 10 (3), 480-9.
